# Supplementary material for: High-intensity acute exercise impacts motor learning in healthy older adults
Source: PubMed Central journal article supplement (PMC10874400; doi:10.1038/s41539-024-00220-2), 2024-02-17
Supplement: 41539_2024_220_MOESM1_ESM.pdf [file 41539_2024_220_MOESM1_ESM.pdf]

## **Supplementary Material: “High-intensity acute exercise impacts motor learning in healthy older adults”**

Eleanor M. Taylor<sup>1</sup>, Claire J. Cadwallader<sup>1</sup>, Dylan Curtin<sup>1</sup>, Trevor T.J. Chong<sup>1,2,3</sup>, Joshua J. Hendrikse<sup>1</sup>, and James P. Coxon<sup>1</sup>

### **Contents**

#### **Supplementary Methods (pp. 2 – 5)**

Linear mixed model fitting

Supplementary Table 1: Model fitting for acquisition - skill measure

Supplementary Table 2: Model fitting for acquisition - force error

Supplementary Table 3: Model fitting for acquisition - trial time

Supplementary Table 4: Model fitting for retention - skill measure

Supplementary Table 5: Model fitting for retention - force error

Supplementary Table 6: Model fitting for retention – trial time

#### **Supplementary Results (pp. 6 – 7)**

Supplementary Table 7: Results of linear mixed models for acquisition

Supplementary Table 8: Results of linear mixed models for retention

## Supplementary Methods

### Linear Mixed Model Fitting

Supplementary tables 1-6 include a summary of model comparisons. For skill measure, force error and trial time models, variables and interactions were added based on theoretical interest and retained where model fit was improved. Model comparisons were conducted with maximum likelihood estimation. In cases where Chi-square comparisons between models were non-significant, the more parsimonious model was selected. A summary of power analysis of selected models available upon request.

**Supplementary table 1. Model fitting for acquisition - skill measure.**

|                     |                | N total obs = 230; N Subjects = 23; N blocks = 10 |                                                                            |                             | Model Fit                |               |               | LRT Test against comparison |              |
|---------------------|----------------|---------------------------------------------------|----------------------------------------------------------------------------|-----------------------------|--------------------------|---------------|---------------|-----------------------------|--------------|
| Model Specification | Model Name     | Compared Model                                    | Model description                                                          | Random Effects              | AIC                      | BIC           | LL            | $\chi^2$                    | $p$          |
| RE only             | Null           |                                                   | Skill ~ (1   Participant)                                                  | Participant                 | 197.85                   | 208.16        | -95.93        |                             |              |
|                     | Skill 1        | Null                                              | Skill ~ (1 Block) + (1   Participant)                                      | Participant, Block          | 141.15                   | 154.90        | -66.57        | 58.70                       | <.001*       |
|                     | Skill 2        | Skill 1                                           | Skill ~ (Block   Participant)                                              | Participant, Block          | 137.81                   | 155.00        | -63.91        | 5.34                        | .02*         |
|                     | Skill 3        | Skill 2                                           | Skill ~ (Block   Participant) + (1   Age)                                  | Participant, Block, Age     | 139.81                   | 160.44        | -63.91        | <.001                       | >.99         |
|                     | Skill 4        | Skill 2                                           | Skill ~ (Block   Participant) + (1   Fitness)                              | Participant, Block, Fitness | Model failed to converge |               |               |                             |              |
| FE main effects     | Skill 4        | Skill 2                                           | Skill ~ Group + Block + Age + (Block   Participant)                        | Participant, Block          | 119.65                   | 147.16        | -51.83        | 24.16                       | <.001*       |
|                     | Skill 5        | Skill 4                                           | Skill ~ Group + Block + Age + Sex + Fitness (Block   Participant)          | Participant, Block          | 115.08                   | 149.46        | -47.54        | 8.57                        | .01*         |
| FE Interactions     | Skill 6        |                                                   | Skill ~ Group × Block + Age + Sex + Fitness + (Block   Participant)        | Participant, Block          | 114.50                   | 152.32        | -46.25        |                             |              |
|                     | <b>Skill 7</b> | <b>Skill 6</b>                                    | <b>Skill ~ Group × Block × Age + Sex + Fitness + (Block   Participant)</b> | <b>Participant, Block</b>   | <b>106.15</b>            | <b>154.28</b> | <b>-39.08</b> | <b>14.35</b>                | <b>.002*</b> |
|                     | Skill 8        | Skill 7                                           | Skill ~ Group × Block × Sex + Age + Fitness + (Block   Participant)        | Participant, Block          | 117.97                   | 166.11        | -44.99        | 2.52                        | 0.47         |
|                     | Skill 9        | Skill 7                                           | Skill ~ Group × Block × Fitness + Sex + Age + (Block   Participant)        | Participant, Block          | Model failed to converge |               |               |                             |              |
|                     | Skill 10       | Skill 7                                           | Skill ~ Group × Block × Age × Sex + Fitness + (Block   Participant)        | Participant, Block          | 111.19                   | 183.39        | -34.60        | 8.96                        | .26          |
|                     | Skill 11       | Skill 7                                           | Skill ~ Group × Block × Age × Fitness + Sex + (Block   Participant)        | Participant, Block          | 111.09                   | 183.29        | -34.55        | 9.06                        | .25          |
|                     |                |                                                   |                                                                            |                             |                          |               |               |                             |              |

Final selected model in bold.

\* $p < 0.5$

**Supplementary table 2. Model fitting for acquisition – force error.**

|                     |                | N total obs = 230; N Subjects = 23; N blocks = 10 |                                                                                            |                             | Model Fit                |                |               | LRT Test against comparison |             |
|---------------------|----------------|---------------------------------------------------|--------------------------------------------------------------------------------------------|-----------------------------|--------------------------|----------------|---------------|-----------------------------|-------------|
| Model Specification | Model Name     | Compared Model                                    | Model description                                                                          | Random Effects              | AIC                      | BIC            | LL            | $\chi^2$                    | $p$         |
| RE only             | Null           |                                                   | Force Error ~ (1   Participant)                                                            | Participant                 | -736.94                  | -726.62        | 371.47        |                             |             |
|                     | Error 1        | Null                                              | Force Error ~ (1   Block) + (1   Participant)                                              | Participant, Block          | -754.52                  | -740.77        | 381.26        | 19.59                       | <.001*      |
|                     | Error 2        | Error 1                                           | Force Error ~ (Block   Participant)                                                        | Participant, Block,         | -771.30                  | -754.11        | 390.65        | 18.78                       | <.001*      |
|                     | Error 3        | Error 2                                           | Force Error ~ (Block   Participant) + (1   Age)                                            | Participant, Block, Age     | -769.30                  | -748.67        | 390.65        | .002                        | .96         |
|                     | Error 4        | Error 2                                           | Force Error ~ (Block   Participant) + (1   Fitness)                                        | Participant, Block, Fitness | Model failed to converge |                |               |                             |             |
| FE main effects     | Error 5        | Error 2                                           | Force Error ~ Group + Block + Age + (Block   Participant)                                  | Participant, Block          | -776.82                  | -749.32        | 396.41        | 11.53                       | .009*       |
|                     | Error 6        | Error 5                                           | Force Error ~ Group + Block + Age + Sex + Fitness + (Block   Participant)                  | Participant, Block          | -780.84                  | -746.45        | 400.42        | 8.01                        | .02*        |
| FE Interactions     | Error 7        |                                                   | Force Error ~ Group × Block + Age + Fitness + Sex + (Block   Participant)                  | Participant, Block          | -776.40                  | -742.02        | 398.20        |                             |             |
|                     | Error 8        | Error 7                                           | Force Error ~ Group × Block × Age + Sex + Fitness + (Block   Participant)                  | Participant, Block          | Model failed to converge |                |               |                             |             |
|                     | <b>Error 9</b> | <b>Error 7</b>                                    | <b>Force Error ~ Group × Block × Age + Sex + Fitness + (1   Block) + (1   Participant)</b> | <b>Participant</b>          | <b>-778.72</b>           | <b>-734.03</b> | <b>402.36</b> | <b>8.32</b>                 | <b>.04*</b> |

Final selected model in bold. \* $p < 0.5$

**Supplementary table 3. Model fitting for acquisition – trial time**

|                     |               | N total obs = 230; N Subjects = 23; N blocks = 10 |                                                                          |                             | Model Fit     |               |               | LRT Test against comparison |             |
|---------------------|---------------|---------------------------------------------------|--------------------------------------------------------------------------|-----------------------------|---------------|---------------|---------------|-----------------------------|-------------|
| Model Specification | Model Name    | Compared Model                                    | Model description                                                        | Random Effects              | AIC           | BIC           | LL            | $\chi^2$                    | $p$         |
| RE only             | Null          |                                                   | Trial Time ~ (1   Participant)                                           | Participant                 | 262.49        | 272.81        | -128.25       |                             |             |
|                     | Time 1        | Null                                              | Trial Time ~ (1   Block) + (1   Participant)                             | Participant, Block          | 235.53        | 249.29        | -113.77       | 28.96                       | <.001*      |
|                     | Time 2        | Time 1                                            | Trial Time ~ (Block   Participant)                                       | Participant, Block          | 151.08        | 168.27        | -70.54        | 86.45                       | <.001*      |
|                     | Time 3        | Time 2                                            | Trial Time ~ (Block   Participant) + (1   Age)                           | Participant, Block, Age     | 153.08        | 173.71        | -70.54        | <.001                       | >.99        |
|                     | Time 4        | Time 2                                            | Trial Time ~ (Block   Participant) + (1   Fitness)                       | Participant, Block, Fitness | 153.08        | 173.71        | -70.54        | <.001                       | >.99        |
| FE main effects     | Time 5        | Time 2                                            | Trial Time ~ Group + Block + Age + (Block   Participant)                 | Participant, Block          | 143.30        | 170.80        | -63.65        | 13.78                       | .003*       |
|                     | Time 4        | Time 3                                            | Trial Time ~ Group + Block + Age + Sex + Fitness + (Block   Participant) | Participant, Block          | 146.25        | 180.63        | -63.12        | 1.05                        | .59         |
| FE Interactions     | Time 5        |                                                   | Trial Time ~ Group × Block + Age + (Block   Participant)                 | Participant, Block          | 146.25        | 180.63        | -63.12        |                             |             |
|                     | <b>Time 6</b> | <b>Time 5</b>                                     | <b>Trial Time ~ Group × Block × Age (Block   Participant)</b>            | <b>Participant, Block</b>   | <b>141.66</b> | <b>182.91</b> | <b>-58.83</b> | <b>9.55</b>                 | <b>.02*</b> |

Final selected model in bold. \* $p < 0.5$

**Supplementary table 4. Model fitting for retention – skill measure**

|                     |             | N total obs = 46; N Subjects = 23; N time = 2 |                                                                       |                      | Model Fit    |              |              | LRT Test against comparison |      |
|---------------------|-------------|-----------------------------------------------|-----------------------------------------------------------------------|----------------------|--------------|--------------|--------------|-----------------------------|------|
| Model Specification | Model Name  | Compared Model                                | Model description                                                     | Random Effects       | AIC          | BIC          | LL           | $\chi^2$                    | $p$  |
| RE only             | Null        |                                               | Skill ~ (1   Participant)                                             | Participant          | 49.69        | 55.18        | -21.85       |                             |      |
|                     | SR 1        | Null                                          | Skill ~ (1   Fitness) + (1   Participant)                             | Participant, fitness | 51.69        | 59.01        | -21.85       | <.001                       | >.99 |
|                     | SR 2        | SR 1                                          | Skill ~ 1   Participant) + (1   Age)                                  | Participant, age     | 51.69        | 59.00        | -21.85       | .001                        | .97  |
| FE main effects     | SR 4        | SR 2                                          | Skill ~ Group + Time + (1   Participant)                              | Participant          | 44.02        | 53.17        | -17.01       | 9.67                        | .01* |
|                     | SR 5        | SR 4                                          | Skill ~ Group + Time + Age + Fitness + Sex + (1   Participant)        | Participant          | 40.97        | 55.60        | -12.47       | 9.05                        | .03* |
| FE Interactions     | <b>SR 6</b> |                                               | <b>Skill ~ Group × Time + Age + Fitness + Sex + (1   Participant)</b> | <b>Participant</b>   | <b>37.21</b> | <b>53.67</b> | <b>-9.60</b> |                             |      |
|                     | SR 8        | SR 6                                          | Skill ~ Group × Time × Age + Sex + Fitness + (1   Participant)        | Participant          | 39.12        | 61.07        | -7.56        | 4.09                        | .25  |
|                     | SR 9        | SR 6                                          | Skill ~ Group × Time × Fitness + Sex + Age + (1   Participant)        | Participant          | 40.82        | 67.77        | -8.41        | 2.39                        | .50  |
|                     | SR 10       | SR 6                                          | Skill ~ Group × Time × Sex + Sex + Age + (1   Participant)            | Participant          | 39.22        | 61.17        | -7.61        | 3.98                        | .26  |

Final selected model in bold. \* $p < 0.5$

**Supplementary table 5. Model fitting for retention – force error**

|                     |             | N total obs = 46; N Subjects = 23; N time = 2 |                                                                             |                      | Model Fit                |                |              | LRT Test against comparison |      |
|---------------------|-------------|-----------------------------------------------|-----------------------------------------------------------------------------|----------------------|--------------------------|----------------|--------------|-----------------------------|------|
| Model Specification | Model Name  | Compared Model                                | Model description                                                           | Random Effects       | AIC                      | BIC            | LL           | $\chi^2$                    | $p$  |
| RE only             | Null        |                                               | Force Error ~ (1   Participant)                                             | Participant          | -126.91                  | -121.43        | 66.46        |                             |      |
|                     | ER 1        | Null                                          | Force Error ~ (1   Fitness) + (1   Participant)                             | Participant, fitness | model failed to converge |                |              |                             |      |
|                     | ER 2        | ER 1                                          | Skill ~ 1   Participant) + (1   Age)                                        | Participant, age     | -125.06                  | -117.75        | 66.53        | 0.15                        | .70  |
| FE main effects     | ER 3        | Null                                          | Force Error ~ Group + Time + (1   Participant)                              | Participant          | -126.97                  | -117.83        | 68.49        | 4.06                        | .13  |
|                     | ER 4        | Null                                          | Force Error ~ Group + Time + Age + Fitness + Sex + (1   Participant)        | Participant          | -128.53                  | -113.90        | 72.26        | 11.61                       | .04* |
| FE Interactions     | <b>ER 5</b> |                                               | <b>Force Error ~ Group × Time + Age + Fitness + Sex + (1   Participant)</b> | <b>Participant</b>   | <b>-130.99</b>           | <b>-114.53</b> | <b>74.49</b> |                             |      |
|                     | ER 6        | ER 5                                          | Force Error ~ Group × Time × Age + Sex + Fitness + (1   Participant)        | Participant          | -131.21                  | -109.26        | 77.60        | 6.22                        | .10  |
|                     | ER 7        | ER 5                                          | Force Error ~ Group × Time × Fitness + Sex + Age + (1   Participant)        | Participant          | -127.82                  | -105.88        | 75.91        | 2.83                        | .42  |
|                     | ER 8        | ER 5                                          | Force Error ~ Group × Time × Sex + Sex + Age + (1   Participant)            | Participant          | -125.83                  | -103.89        | 74.92        | 0.84                        | .84  |

Final selected model in bold. \* $p < 0.5$

**Supplementary table 6. Model fitting for retention – trial time**

|                        |             | N total obs = 46; N Subjects = 23; N time = 2 |                                                                     |                      | Model Fit                |              |               | LRT Test against comparison |      |
|------------------------|-------------|-----------------------------------------------|---------------------------------------------------------------------|----------------------|--------------------------|--------------|---------------|-----------------------------|------|
| Model Specification    | Model Name  | Compared Model                                | Model description                                                   | Random Effects       | AIC                      | BIC          | LL            | $\chi^2$                    | $p$  |
| RE only                | Null        |                                               | Trial Time ~ (1   Participant)                                      | Participant          | 61.17                    | 66.65        | -27.58        |                             |      |
|                        | TR 1        | Null                                          | Trial Time ~ (1   Fitness) + (1   Participant)                      | Participant, fitness | 63.17                    | 70.48        | -27.58        | <.001                       | >.99 |
|                        | TR 2        | Null                                          | Trial Time ~ 1   Participant) + (1   Age)                           | Participant, age     | Model failed to converge |              |               |                             |      |
| FE main effects        | TR 3        | Null                                          | Trial Time ~ Group + Time + (1   Participant)                       | Participant          | 61.86                    | 71.01        | -25.93        | 3.30                        | .19  |
|                        | TR 4        | Null                                          | Trial Time ~ Group + Time + Age + Fitness + Sex + (1   Participant) | Participant          | 66.61                    | 81.23        | -25.30        | 4.56                        | .47  |
| <b>FE Interactions</b> | <b>TR 5</b> |                                               | <b>Trial Time ~ Group × Time + (1   Participant)</b>                | <b>Participant</b>   | <b>63.36</b>             | <b>74.34</b> | <b>-25.68</b> |                             |      |

Final selected model in bold. \* $p < 0.5$

## Supplementary Results

**Supplementary table 7**

Results of linear mixed models for acquisition across skill, force error and trial time measures

| Parameter                      | Estimate (SE)  | 95% CI [lower, upper] | Test (df)             | p                |
|--------------------------------|----------------|-----------------------|-----------------------|------------------|
| <b>Skill</b>                   |                |                       |                       |                  |
| Group (reference = rest)       | -6.58 (2.75)   | -12.01, -1.15         | $F(1, 17.00) = 5.71$  | <b>.03*</b>      |
| Block                          | -0.05 (0.19)   | -0.42, 0.32           | $F(1, 19.00) = 2.30$  | .14              |
| Age                            | -0.10 (0.03)   | -0.17, -0.03          | $F(1, 19.00) = 5.74$  | <b>.03*</b>      |
| Younger-old vs older           | 0.71 (0.27)    | 0.13, 1.28            | $t(17.06) = 2.59$     | <b>.02*</b>      |
| Fitness (VO <sub>2</sub> peak) | -0.03 (0.01)   | -0.05, -0.01          | $F(1, 17.00) = 7.71$  | <b>.01*</b>      |
| Sex (reference = male)         | -0.52(0.23)    | -0.97, -0.07          | $F(1, 17.00) = 5.18$  | <b>.04*</b>      |
| Group × Block                  | 0.44 (0.22)    | 0.00, 0.89            | $F(1, 19.00) = 3.91$  | .06              |
| Group × Age                    | 0.10 (0.04)    | 0.02, 0.18            | $F(1, 17.00) = 5.60$  | <b>.03*</b>      |
| Block × Age                    | 0.002 (0.003)  | 0.00, 0.01            | $F(1, 19.00) = 1.18$  | .29              |
| Group × Block × Age            | -0.007 (0.003) | -0.01, 0.00           | $F(1, 19.00) = 4.61$  | <b>.05*</b>      |
| Condition × Block trend        |                |                       |                       |                  |
| Younger-old (rest)             | 0.06 (0.02)    | 0.01, 0.11            | $t(19.00) = 2.66$     | <b>.03*</b>      |
| Younger-old (exercise)         | 0.06 (0.01)    | 0.03, 0.09            | $t(19.00) = 4.51$     | <b>.001*</b>     |
| Older (rest)                   | 0.08 (0.02)    | 0.03, 0.12            | $t(19.00) = 4.40$     | <b>.001*</b>     |
| Older (exercise)               | -0.001 (0.02)  | -0.04, -0.08          | $t(19.00) = -0.08$    | >.99             |
| <b>Force Error</b>             |                |                       |                       |                  |
| Group (reference = rest)       | 1.04 (0.47)    | 0.10, 1.97            | $F(1, 19.76) = 4.81$  | <b>.04*</b>      |
| Block                          | 0.004 (0.02)   | -0.04, 0.03           | $F(1, 197.96) = 6.57$ | <b>.01*</b>      |
| Age                            | 0.01 (0.01)    | 0.00, 0.02            | $F(1, 19.55) = 2.35$  | .14              |
| Fitness (VO <sub>2</sub> peak) | 0.003 (0.002)  | 0.00, 0.01            | $F(1, 17.00) = 2.71$  | .12              |
| Sex (reference = male)         | 0.08 (0.04)    | 0.00, 0.15            | $F(1, 17.00) = 4.03$  | .06              |
| Group × Block                  | -0.05 (0.01)   | -0.10, -0.01          | $F(1, 195.00) = 2.21$ | <b>.03*</b>      |
| Group × Age                    | -0.02 (0.01)   | -0.03, 0.00           | $F(1, 19.78) = 4.82$  | <b>.04*</b>      |
| Block × Age                    | 0.001 (<.001)  | -0.001, 0.001         | $F(1, 195.00) = 4.93$ | <b>.03*</b>      |
| Group × Block × Age            | 0.001 (<.001)  | 0.00, 0.001           | $F(1, 195.00) = 5.70$ | <b>.02*</b>      |
| Condition × Block trend        |                |                       |                       |                  |
| Younger-old (rest)             | -0.01 (0.002)  | -0.01, -0.001         | $t(112.8) = -2.54$    | <b>.02*</b>      |
| Younger-old (exercise)         | -0.01 (0.002)  | -0.01, -0.003         | $t(35.4) = -4.34$     | <b>&lt;.001*</b> |
| Older (rest)                   | -0.01 (0.002)  | -0.01, -0.002         | $t(72.2) = -3.20$     | <b>.004*</b>     |
| Older (exercise)               | 0.002 (0.002)  | -0.002, 0.01          | $t(80.5) = 1.22$      | .45              |
| <b>Trial Time</b>              |                |                       |                       |                  |
| Group (reference = rest)       | -2.62 (3.06)   | -8.66, 3.42           | $F(1, 19.00) = 0.73$  | .40              |
| Block                          | 0.83 (0.35)    | 0.15, 1.51            | $F(1, 19.00) = 6.28$  | <b>.02*</b>      |
| Age                            | 0.02 (0.04)    | -0.05, 0.09           | $F(1, 19.00) = 3.25$  | .09              |
| Group × Block                  | -0.62 (0.41)   | -1.44, 0.20           | $F(1, 19.00) = 2.23$  | .15              |
| Group × Age                    | .0432 (0.05)   | -0.05, 0.13           | $F(1, 19.00) = 0.90$  | .35              |
| Block × Age                    | -0.01 (0.01)   | -0.02, 0.00           | $F(1, 19.00) = 7.62$  | <b>.01*</b>      |
| Younger-old                    | -0.002 (0.02)  | -0.06, 0.05           | $t(19.00) = -0.09$    | >.99             |
| Older                          | -0.09 (0.02)   | -0.14, -0.04          | $t(19.00) = -4.38$    | <b>.001*</b>     |
| Group × Block × Age            | 0.01 (0.01)    | 0.00, 0.02            | $F(1, 19.00) = 2.18$  | .16              |

Df = degrees of freedom. *F* statistic derived from type III ANOVA. Pairwise comparisons and trends are indented.

\**p* > .05

### Supplementary table 8

Results of linear mixed models for retention across skill, force error and trial time measures

| Parameter                      | Estimate (SE)   | 95% CI       | Test (df)         | p            |
|--------------------------------|-----------------|--------------|-------------------|--------------|
| <b>Skill</b>                   |                 |              |                   |              |
| Group (reference = rest)       | -0.42 (1.92)    | 2.05, 9.82   | $F(1, 18) = 1.79$ | .20          |
| Time (reference = T1)          | -0.23 (0.06)    | -0.34, -0.12 | $F(1,21) = 10.53$ | .004*        |
| Age                            | -0.05 (0.02)    | -0.10, 0.00  | $F(1,18) = 4.16$  | .06          |
| Fitness (VO <sub>2</sub> peak) | -0.02 (0.01)    | -0.05, 0.00  | $F(1,18) = 2.77$  | .11          |
| Sex (reference = male)         | -0.52(0.23)     | -0.97, -0.07 | $F(1,18) = 4.79$  | <b>.04*</b>  |
| Group × Time                   | 0.20 (0.08)     | 0.03, 0.36   | $F(1,21) = 5.98$  | <b>.02*</b>  |
| Rest (T2 vs T1)                | -0.23 (0.06)    | -0.35, -0.11 | $t(21) = -4.11$   | <b>.002*</b> |
| Exercise (T2 vs T1)            | -0.03 (0.06)    | -0.15, 0.09  | $t(21) = -0.55$   | >.99         |
| <b>Force Error</b>             |                 |              |                   |              |
| Group (reference = rest)       | 0.04 (0.04)     | -0.04, 0.12  | $F(1, 18) = 0.45$ | .51          |
| Time (reference = T1)          | 0.03 (0.01)     | 0.01, 0.04   | $F(1,21) = 3.92$  | .06          |
| Age                            | 0.01 (<0.001)   | 0.00, 0.02   | $F(1,18) = 3.13$  | .09          |
| Fitness (VO <sub>2</sub> peak) | <0.001 (<0.001) | 0.00, 0.01   | $F(1,18) = 2.06$  | .17          |
| Sex (reference = male)         | 0.09 (0.04)     | 0.00, 0.18   | $F(1,18) = 4.07$  | .06          |
| Group × Time                   | -0.03 (0.01)    | -0.05, 0.00  | $F(1,21) = 4.50$  | <b>.05*</b>  |
| Rest (T2 vs T1)                | 0.03 (0.01)     | 0.01, 0.04   | $t(21) = 2.97$    | <b>.01*</b>  |
| Exercise (T2 vs T1)            | -0.001 (0.01)   | -0.02, 0.02  | $t(21) = -0.10$   | >.99         |
| <b>Trial Time</b>              |                 |              |                   |              |
| Group (reference = rest)       | 0.15 0.32       | -0.51, 0.80  | $F(1, 18) = 0.35$ | .56          |
| Time (reference = T1)          | 0.06 0.08       | -0.10, 0.23  | $F(1,21) = 3.02$  | .10          |
| Group × Time                   | 0.08 (0.12)     | -0.16, 0.32  | $F(1,21) = 0.46$  | .51          |

Df = degrees of freedom. *F* statistic derived from type III ANOVA.

Pairwise comparisons and trends are indented.

\**p* >.05
